# Supplementary material for: An ultrasensitive electrochemical sensor for phospholipase C via signal amplification based on breathing ATRP and its application
Source: Royal Society of Chemistry journal article supplement (doi:10.1039/d3an00234a), 2023-01-01
Supplement: d3an00234a1.pdf [file d3an00234a1.pdf]

**An ultrasensitive electrochemical sensor for phospholipase C via signal  
amplification based on breathing ATRP and its application**

Xiwen Li<sup>§</sup>, Peiran Meng<sup>§</sup>, Mingyang Sun, Yue Chen, Zhiyi Song, Xinyao Wang, Na Li and Yue Sun\*

School of Chemistry and Chemical Engineering, Liaoning Normal University, Dalian 116029, China

<sup>§</sup>These authors contributed equally.

Corresponding author:

Email: [yuesun@lnnu.edu.cn](mailto:yuesun@lnnu.edu.cn)

Postal address: Yue Sun, School of Chemistry and Chemical Engineering, Liaoning Normal

University, Dalian 116029, China

Tel.: +86 411 82158329; fax: +86 411 82156858

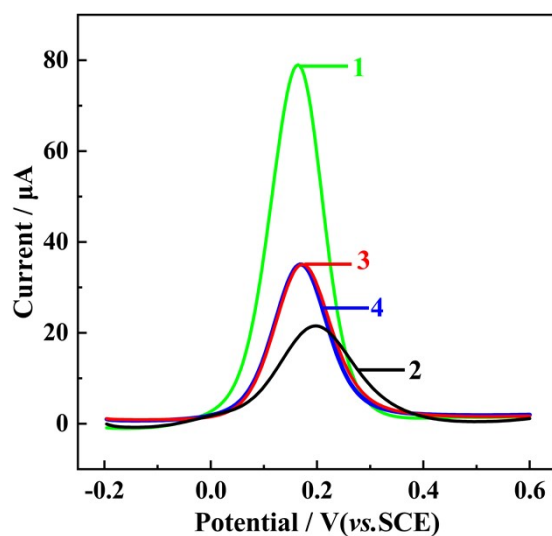

**Fig.S 1** DPV results of Cys/Au (curve 1, curve 2) and PE/Cys/Au electrode (curve 3, curve 4) before (curve 1, curve 3) or after (curve 2, curve 4) soaking in  $\text{ZrOCl}_2$  solution.

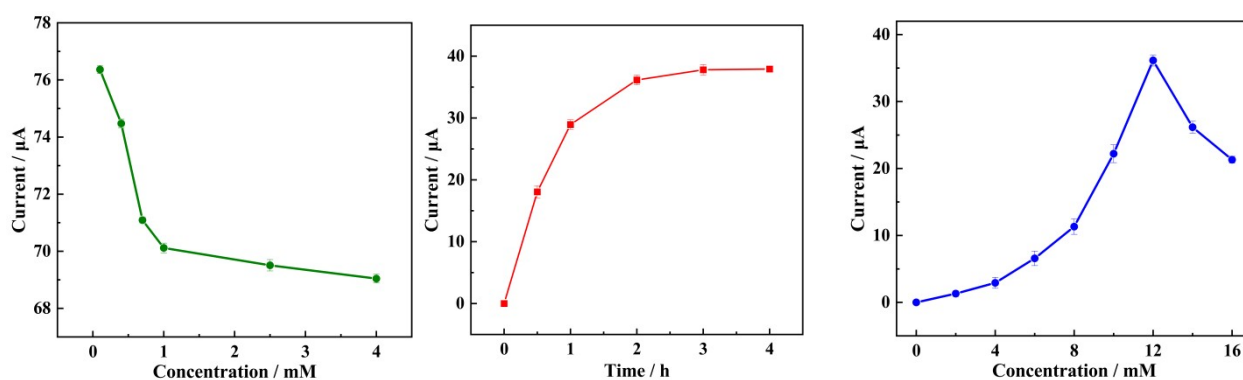

**Fig.S 2** Selection of Cys concentration (A), polymerization time (B) and FcMMA concentration (C).

**Table S1** Analytical performance of different methods for PLC detection.

| Methods     | Materials                                                | Linear response range | LOD   | Ref. |
|-------------|----------------------------------------------------------|-----------------------|-------|------|
| Fluorometry | 11-mercaptoundecanoic acid-gold nanodot-liposome hybrids | 5-300 U/L             | 2 U/L | 1    |

|                      |                                                               |                                                       |                                                  |           |
|----------------------|---------------------------------------------------------------|-------------------------------------------------------|--------------------------------------------------|-----------|
| Fluorometry          | water-soluble<br>conjugated polyelectrolyte<br>-lipid complex | 0-100 $\mu\text{mol/L}$                               | 1 $\text{nmol/L}$                                | 2         |
| Enzyme<br>catalysis  | phosphomolybdate complex                                      | 10-10 <sup>6</sup> $\text{nmol/L}$                    | 10 $\text{nmol/L}$                               | 3         |
| LC-MS<br>assay       | 1-palmitoyl-2-oleoyl-<br>diacylglycerol                       | 1-10 $\text{U/mL}$                                    | 1 $\text{U/mL}$                                  | 4         |
| Electrochem<br>istry | PFCMMA/Zr <sup>4+</sup> /PE/Cys/Au<br>electrode               | 1-40 $\text{U/L}$<br>(0.78-31.01<br>$\text{nmol/L}$ ) | 0.27 $\text{U/L}$<br>(0.45<br>$\text{nmol/L}$ )* | This Work |

\* The value conversion was calculated according to the information provided by the reagent company

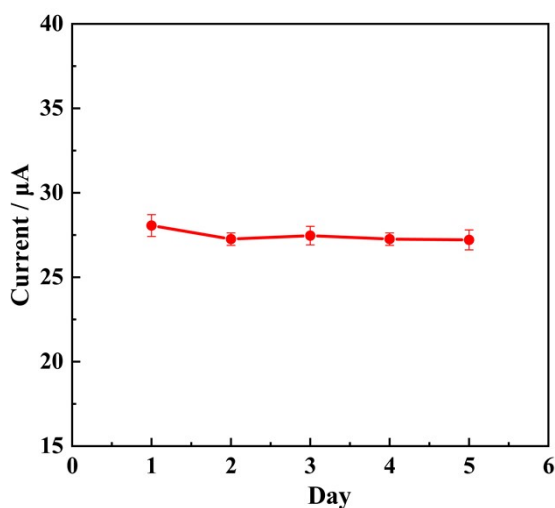

**Fig.S 3** Relationship of SWV peak current of PFCMMA/Zr<sup>4+</sup>/PE/Cys/Au electrode with days.

**Table S2** Determination of PLC in three cell extracts by Elisa kit and PFCMMA/Zr<sup>4+</sup>/PE/Cys/Au

|       |                                                | PFCMMA/Zr <sup>4+</sup> /PE/Cys/Au electrodes                 |                          |                                         |                 |            |
|-------|------------------------------------------------|---------------------------------------------------------------|--------------------------|-----------------------------------------|-----------------|------------|
| cells | ELISA kit<br>(U/L)<br>[mean $\pm$ SD<br>(n=3)] | Direct detection<br>(U/L)<br>[mean $\pm$ SD (n=3)]<br>and RSD | Standard addition method |                                         |                 |            |
|       |                                                |                                                               | Added<br>(U/L)           | Found (U/L)<br>[mean $\pm$ SD<br>(n=3)] | Recovery<br>(%) | RSD<br>(%) |
|       |                                                |                                                               |                          |                                         |                 |            |

|            |             |             |       |     |             |        |       |
|------------|-------------|-------------|-------|-----|-------------|--------|-------|
| MCF-7      | 1.380±0.051 | 1.406±0.038 | 2.73% | 0.5 | 1.870±0.034 | 98.0%  | 1.80% |
|            |             |             |       | 1.0 | 2.388±0.033 | 100.7% | 1.39% |
|            |             |             |       | 1.5 | 2.899±0.045 | 101.2% | 1.57% |
|            |             |             |       | 2.0 | 3.336±0.050 | 97.8%  | 1.48% |
|            |             |             |       | 2.5 | 3.854±0.053 | 98.9%  | 1.36% |
| MDA-MB-231 | 1.519±0.067 | 1.581±0.053 | 3.46% | 0.5 | 2.036±0.062 | 103.5% | 3.05% |
|            |             |             |       | 1.0 | 2.495±0.067 | 97.6%  | 2.66% |
|            |             |             |       | 1.5 | 3.015±0.062 | 99.8%  | 2.05% |
|            |             |             |       | 2.5 | 4.093±0.062 | 103.0% | 1.53% |
|            |             |             |       | 5.0 | 6.723±0.256 | 104.1% | 3.92% |
| MCF-10A    | 0.730±0.088 | 0.666±0.013 | 1.73% | 0.5 | 1.234±0.026 | 100.9% | 2.14% |
|            |             |             |       | 1.0 | 1.743±0.036 | 101.3% | 2.06% |
|            |             |             |       | 1.5 | 2.289±0.018 | 103.9% | 0.80% |
|            |             |             |       | 2.0 | 2.808±0.056 | 103.9% | 2.04% |
|            |             |             |       | 2.5 | 3.199±0.036 | 98.7%  | 1.13% |

## Reference

1. Chen, W.Y.; Chen, L.Y.; Ou, C.M.; Huang, C.C.; Wei, S.C.; Chang, H.T., Synthesis of fluorescent gold nanodot–liposome hybrids for detection of phospholipase C and its Inhibitor. *Anal. Chem.* **2013**, 85, 8834-8840.
2. Liu, Y.; Ogawa, K.; Schanze, K.S., Conjugated polyelectrolyte based real-time fluorescence assay for phospholipase C. *Anal. Chem.* **2008**, 80, 150-158.
3. Durban, M. A.; Bornscheuer, U.T., An improved assay for the determination of phospholipase C activity. *Eur. J. Lipid Sci. Tech.* **2007**, 109, 469–473.
4. Murakami, C.; Mizuno, S.; Kado, S.; Sakane, F., Development of a liquid chromatography-mass spectrometry based enzyme activity assay for phosphatidylcholine-specific phospholipase C. *Anal. Biochem.* **2017**, 526, 43-49.
